# Supplementary material for: Generating Potential Protein-Protein Interaction Inhibitor Molecules Based on Physicochemical Properties
Source: MDPI journal article supplement (doi:10.3390/molecules28155652), 2023-07-26
Supplement: s1 [file s1]

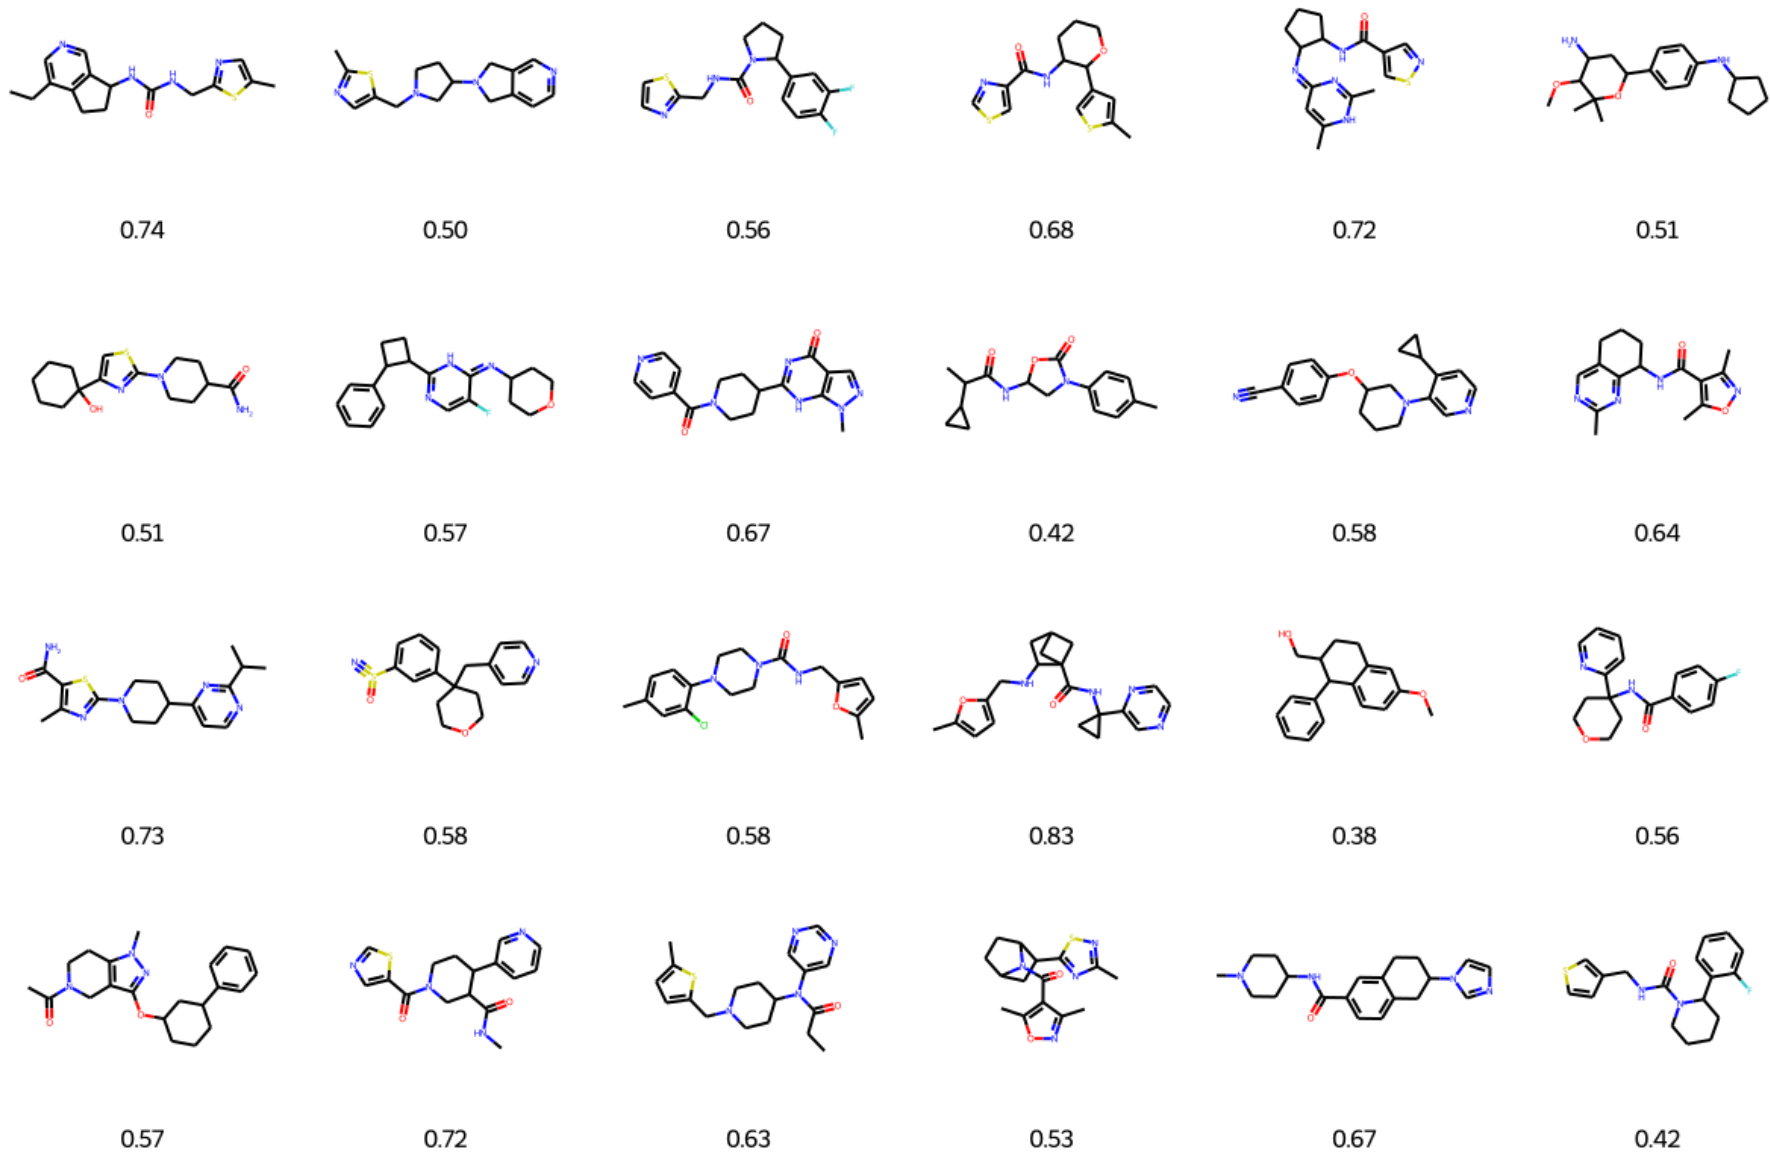

Supplementary Figure S1: **QED-based generated molecules.**

These compounds were randomly extracted from the library created. The value under the compound is the QEPI score.

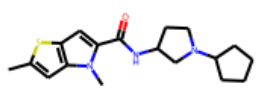

0.62

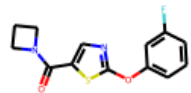

0.51

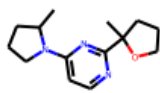

0.31

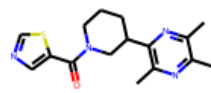

0.55

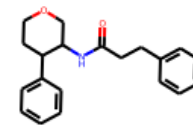

0.46

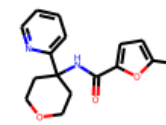

0.67

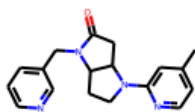

0.54

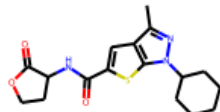

0.70

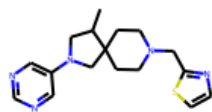

0.53

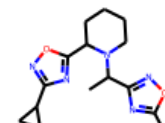

0.53

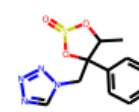

0.47

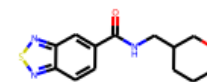

0.68

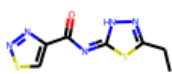

0.56

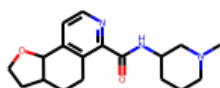

0.43

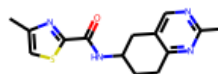

0.64

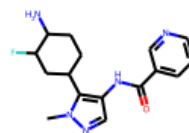

0.72

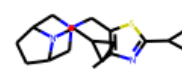

0.34

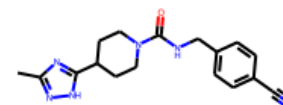

0.69

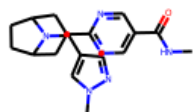

0.72

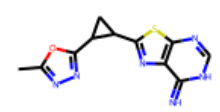

0.56

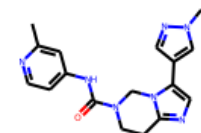

0.70

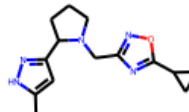

0.72

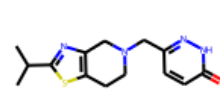

0.68

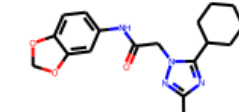

0.73

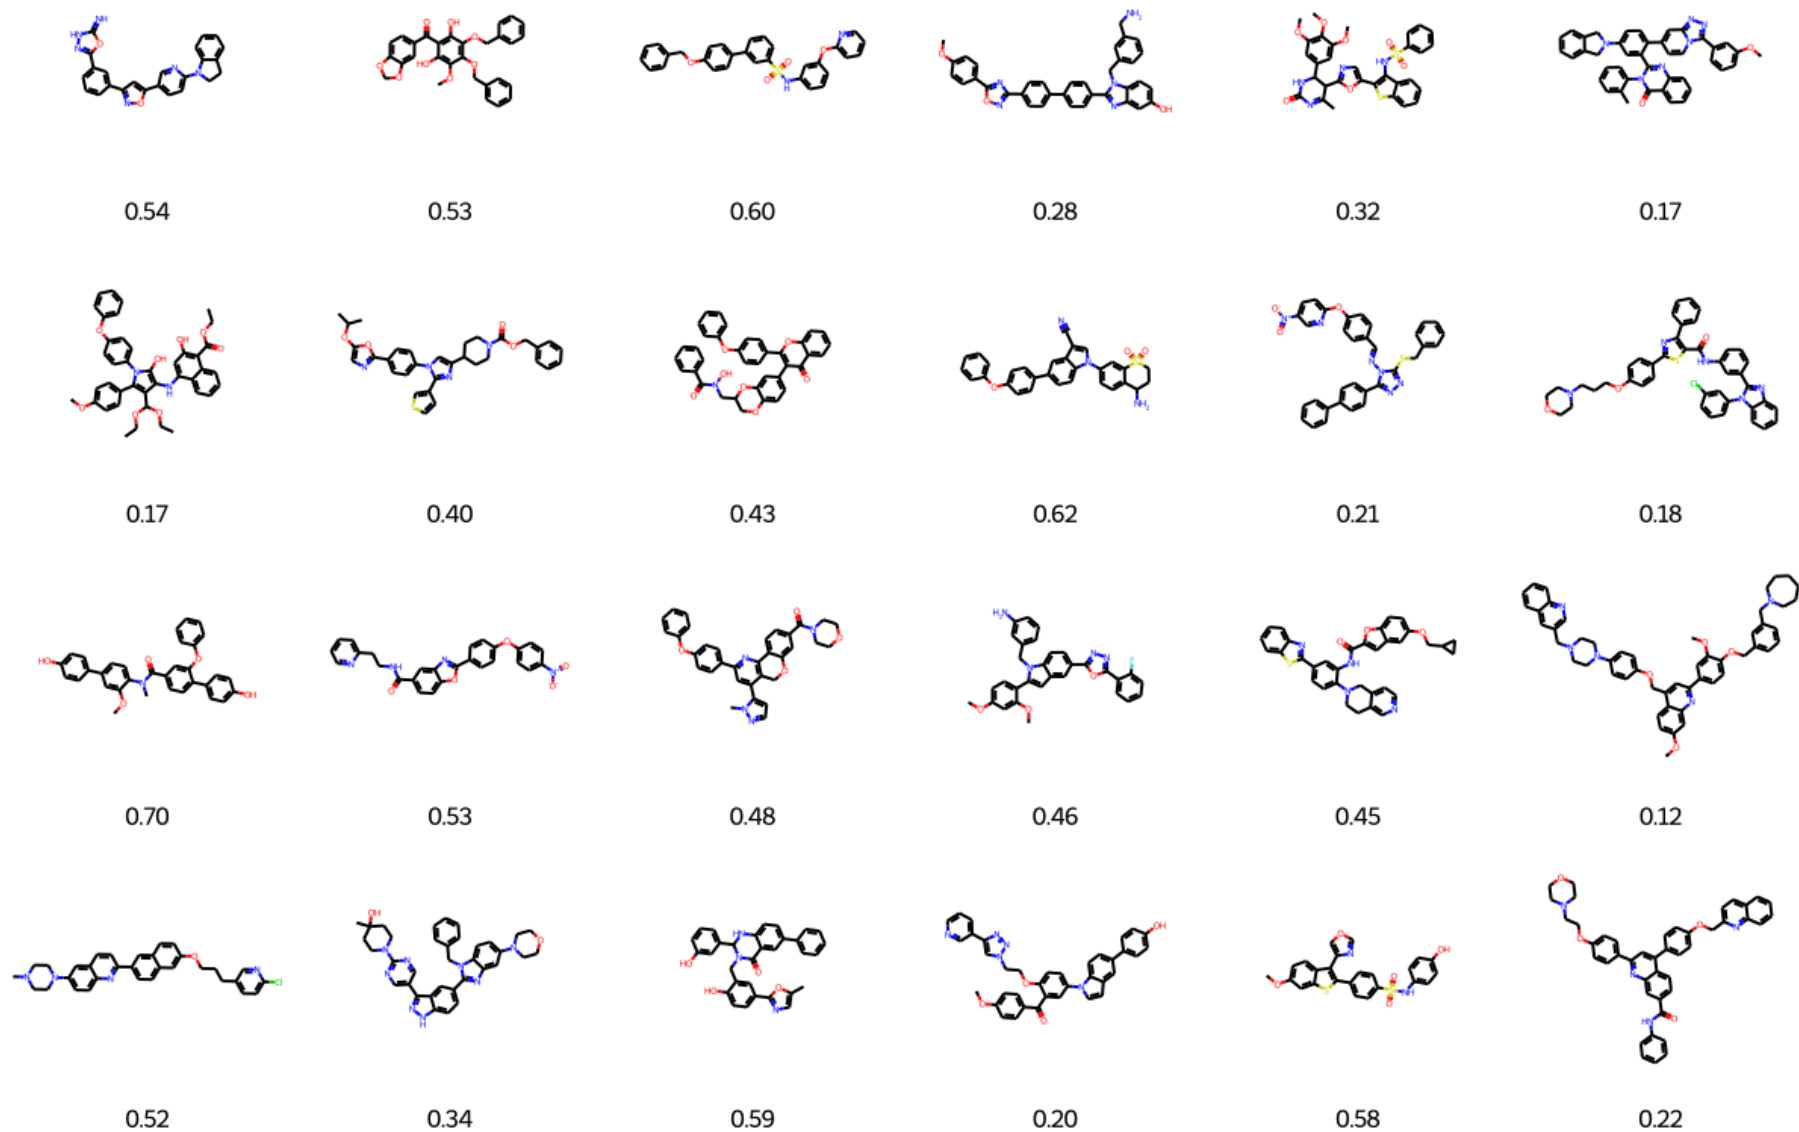

Supplementary Figure S2: **RO4-based generated molecules.**

These compounds were randomly extracted from the library created. The value under the compound is the QEPPi score.

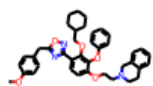

0.28

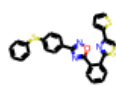

0.36

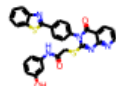

0.35

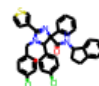

0.55

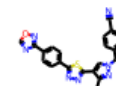

0.36

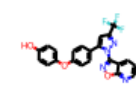

0.56

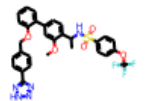

0.33

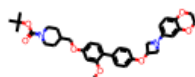

0.54

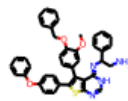

0.23

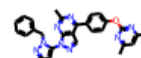

0.30

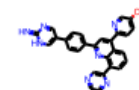

0.45

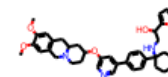

0.45

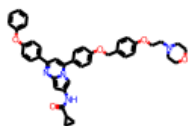

0.26

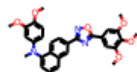

0.32

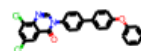

0.50

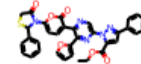

0.20

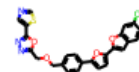

0.34

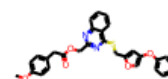

0.33

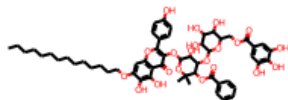

0.08

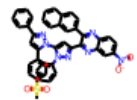

0.31

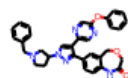

0.50

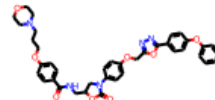

0.21

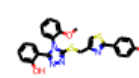

0.44

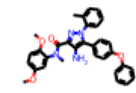

0.55

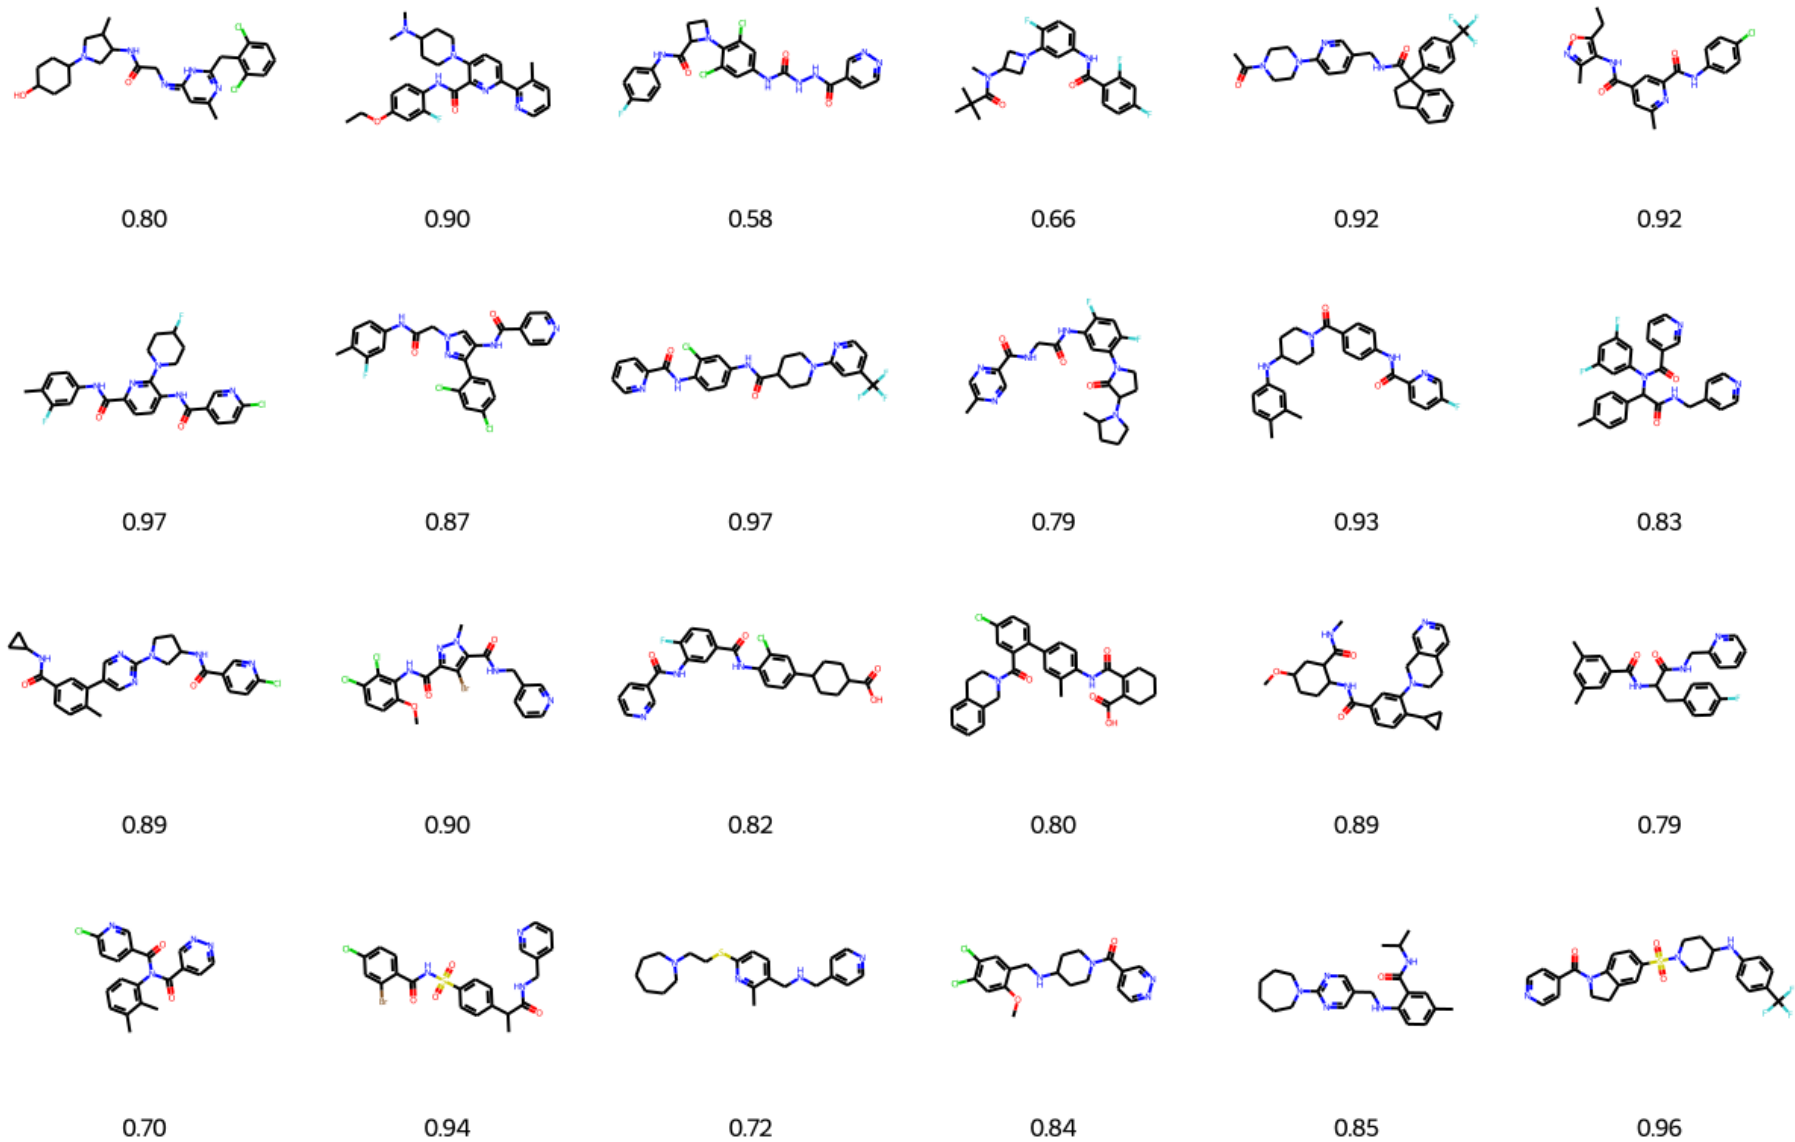

Supplementary Figure S3: **QEPPi-based generated molecules.**

These compounds were randomly extracted from the library created. The value under the compound is the QEPPi score.



0.62



0.51



0.31



0.55



0.46



0.67

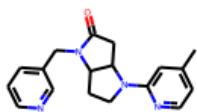

0.54



0.70

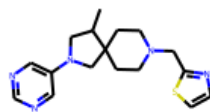

0.53

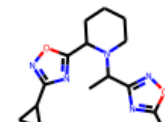

0.53



0.47



0.68

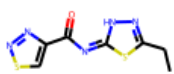

0.56



0.43

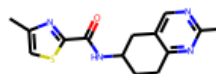

0.64

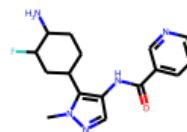

0.72

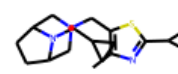

0.34

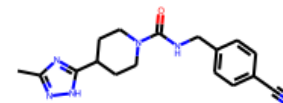

0.69

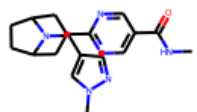

0.72

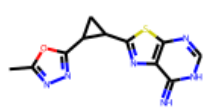

0.56

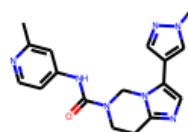

0.70

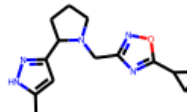

0.72

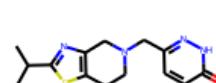

0.68

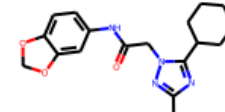

0.73

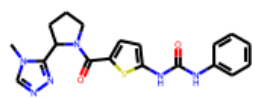

0.85

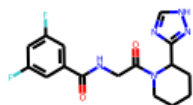

0.75

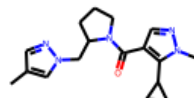

0.61

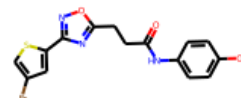

0.87

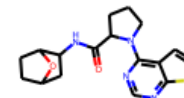

0.69

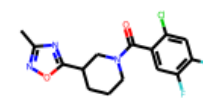

0.54

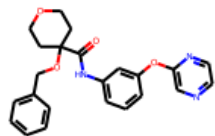

0.88

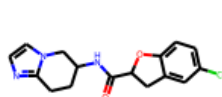

0.62

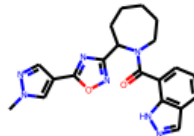

0.61

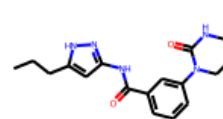

0.60

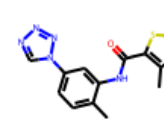

0.73

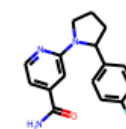

0.57

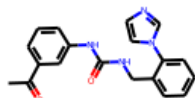

0.86

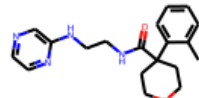

0.81

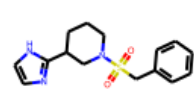

0.62

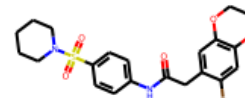

0.87

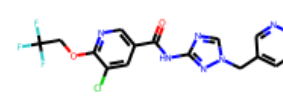

0.77

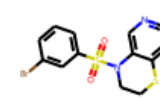

0.54

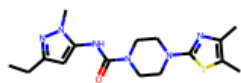

0.69

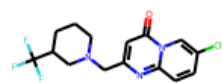

0.49

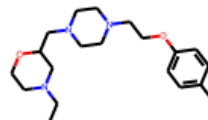

0.39

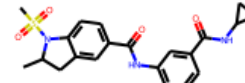

0.81

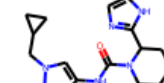

0.74

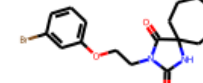

0.47

Supplementary Figure S4: **Compounds from Enamine PPI library.**

These compounds were randomly extracted from the library. The value under the compound is the QEPPi score.

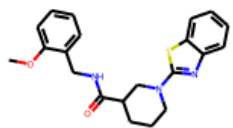

0.88

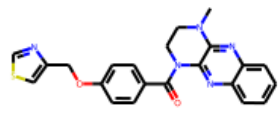

0.57

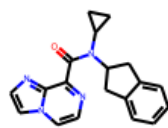

0.61

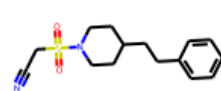

0.37

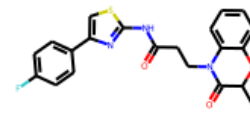

0.94

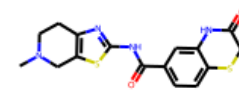

0.66

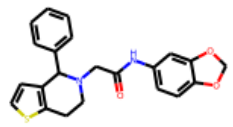

0.85

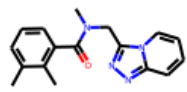

0.59

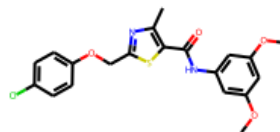

0.89

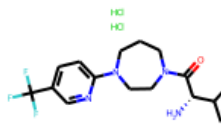

0.53

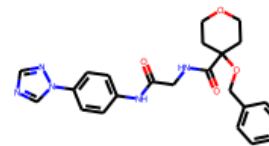

0.74

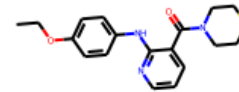

0.77

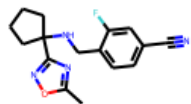

0.75

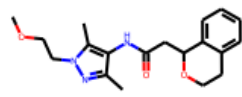

0.80

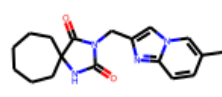

0.65

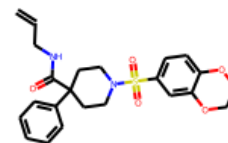

0.86

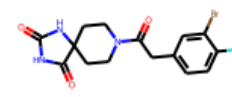

0.42

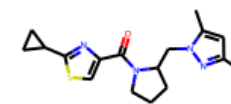

0.61

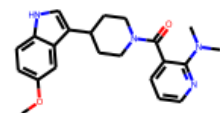

0.85

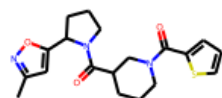

0.64

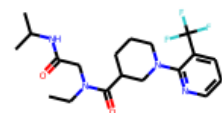

0.57

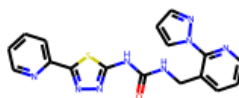

0.57

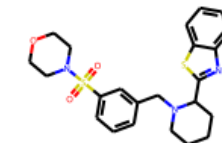

0.74

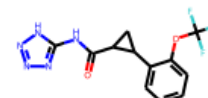

0.75
